# Supplementary material for: Integrative analysis in Pinus revealed long‐term heat stress splicing memory
Source: PubMed Central journal article supplement — Plant J. 2022 Oct 13;112(4):998–1013. doi: 10.1111/tpj.15990 (PMC9828640; doi:10.1111/tpj.15990), 2022-10-13

Figure S1

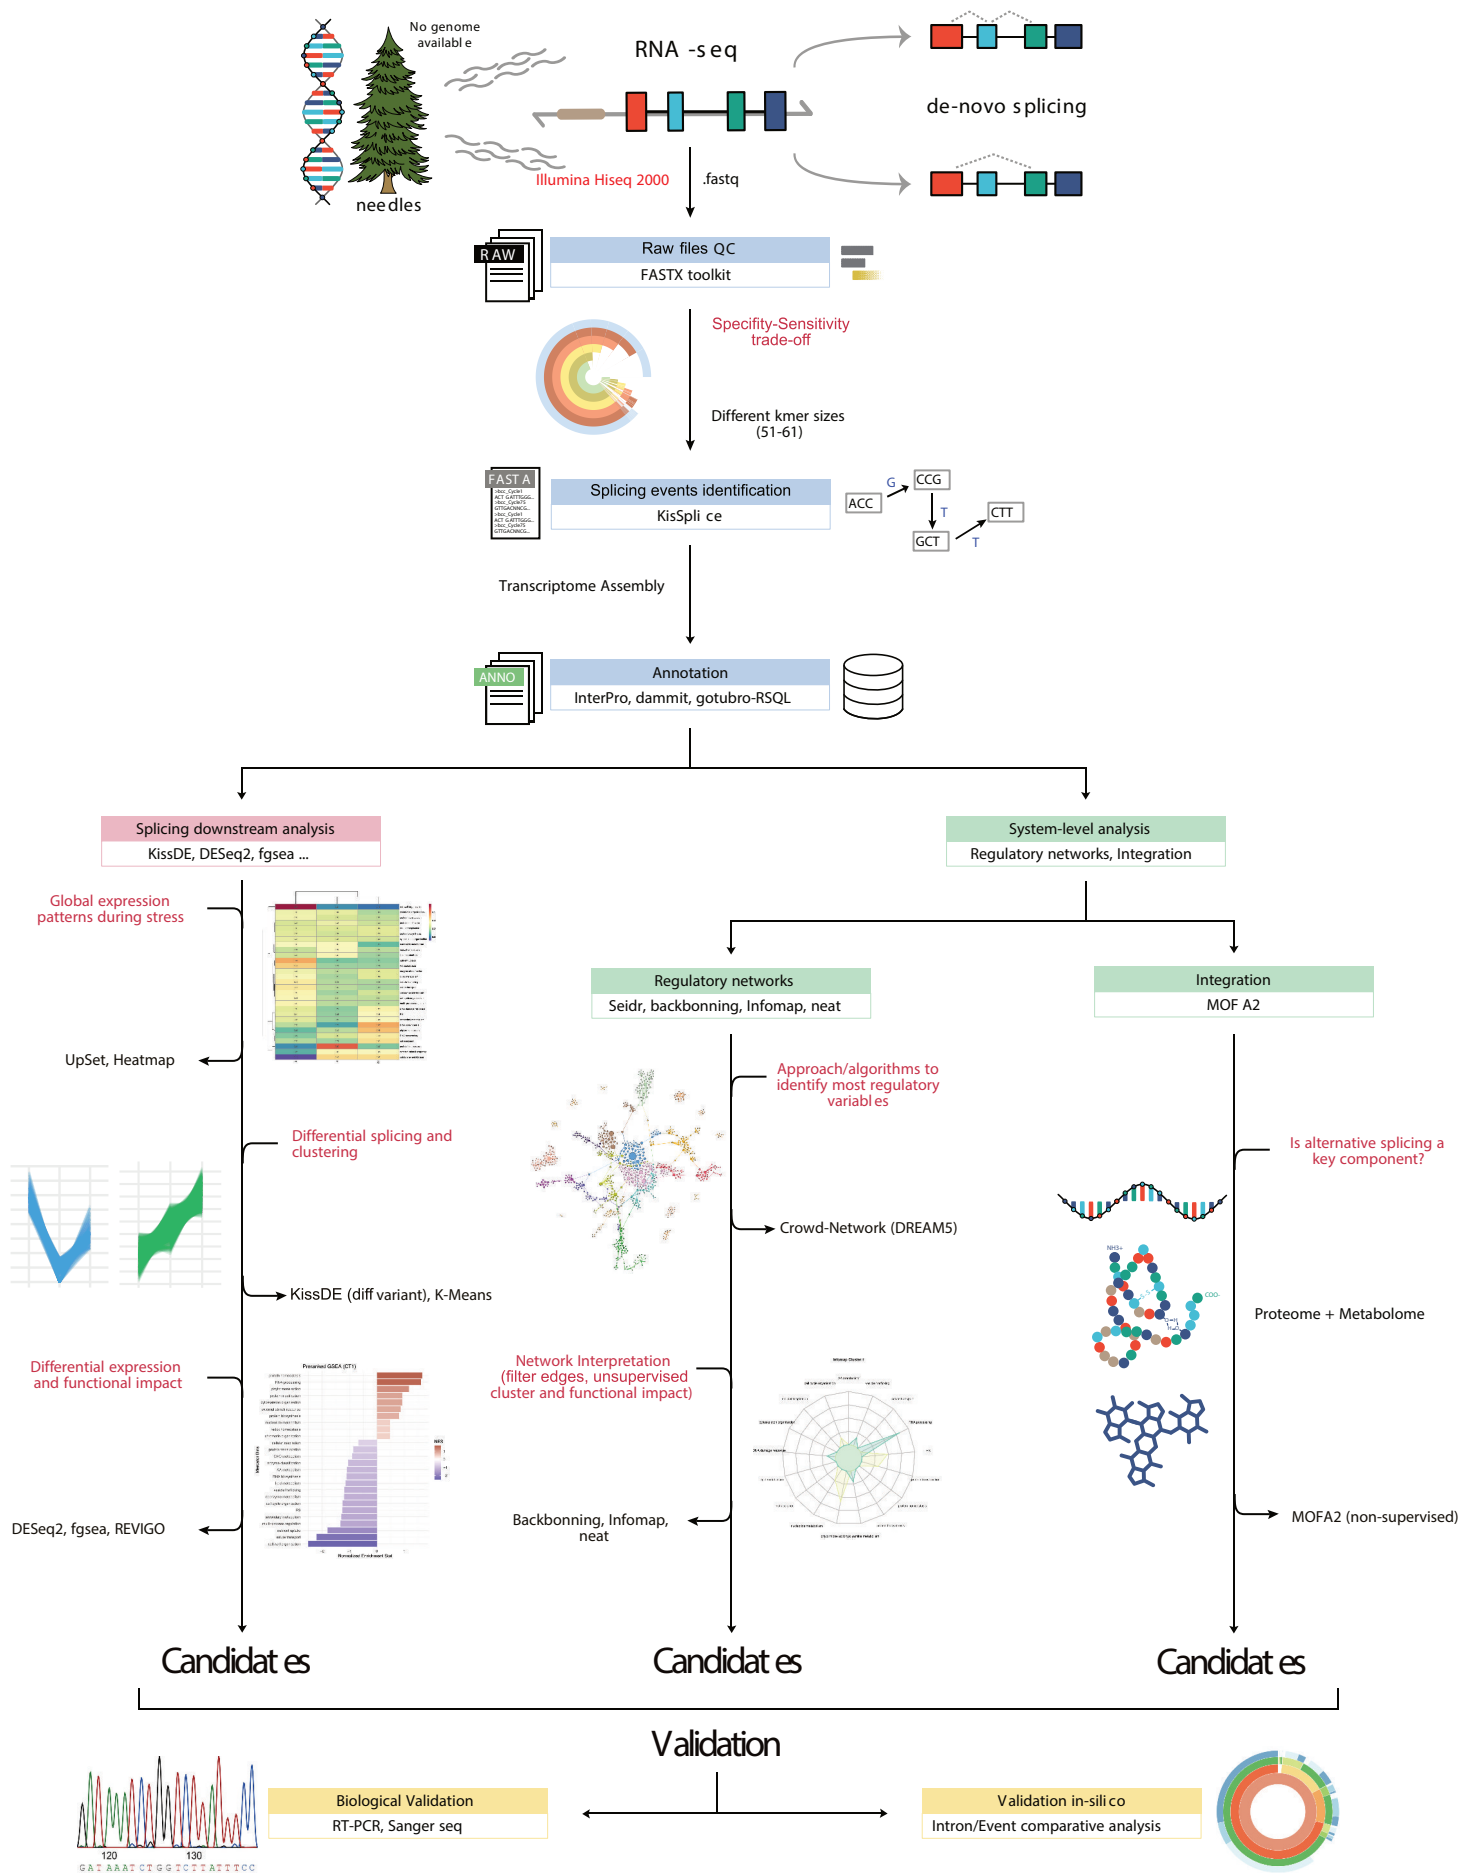

Figure S2

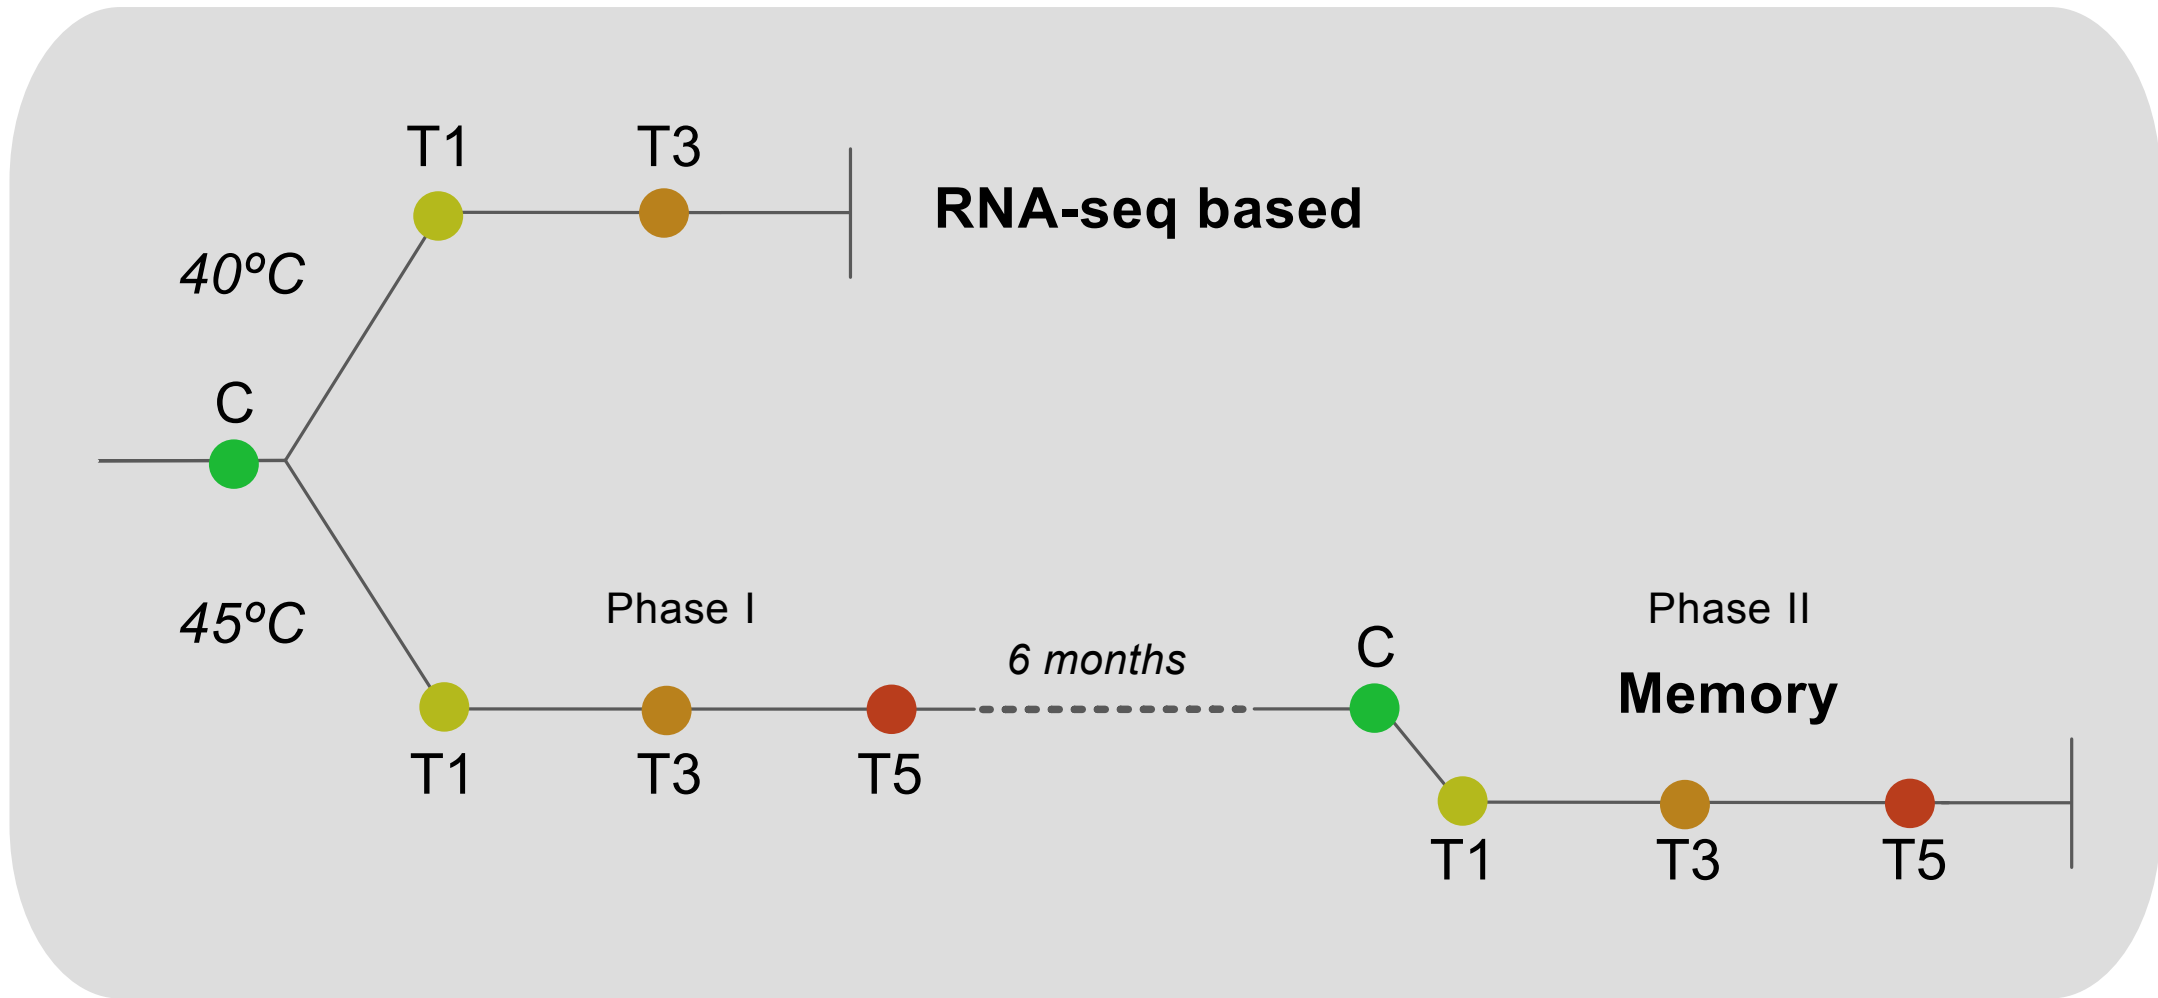

● C = Control ● T1 = 6 h stress (day 1) ● T3 = 18 h stress (day 3) ● T5 = 30 h stress (day 5)

Figure S3

(a)

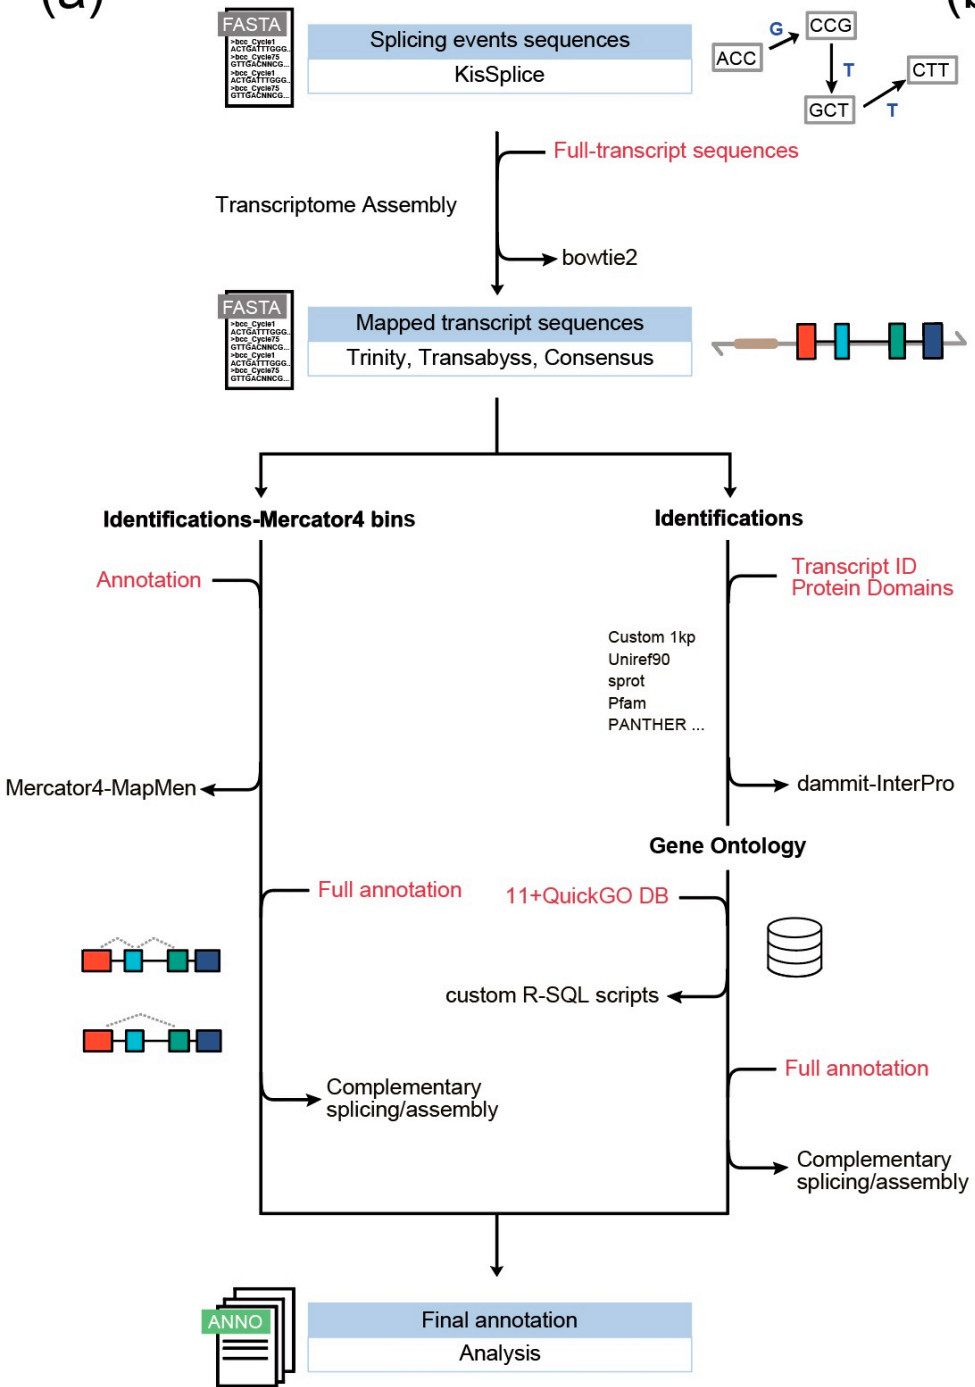

(b)

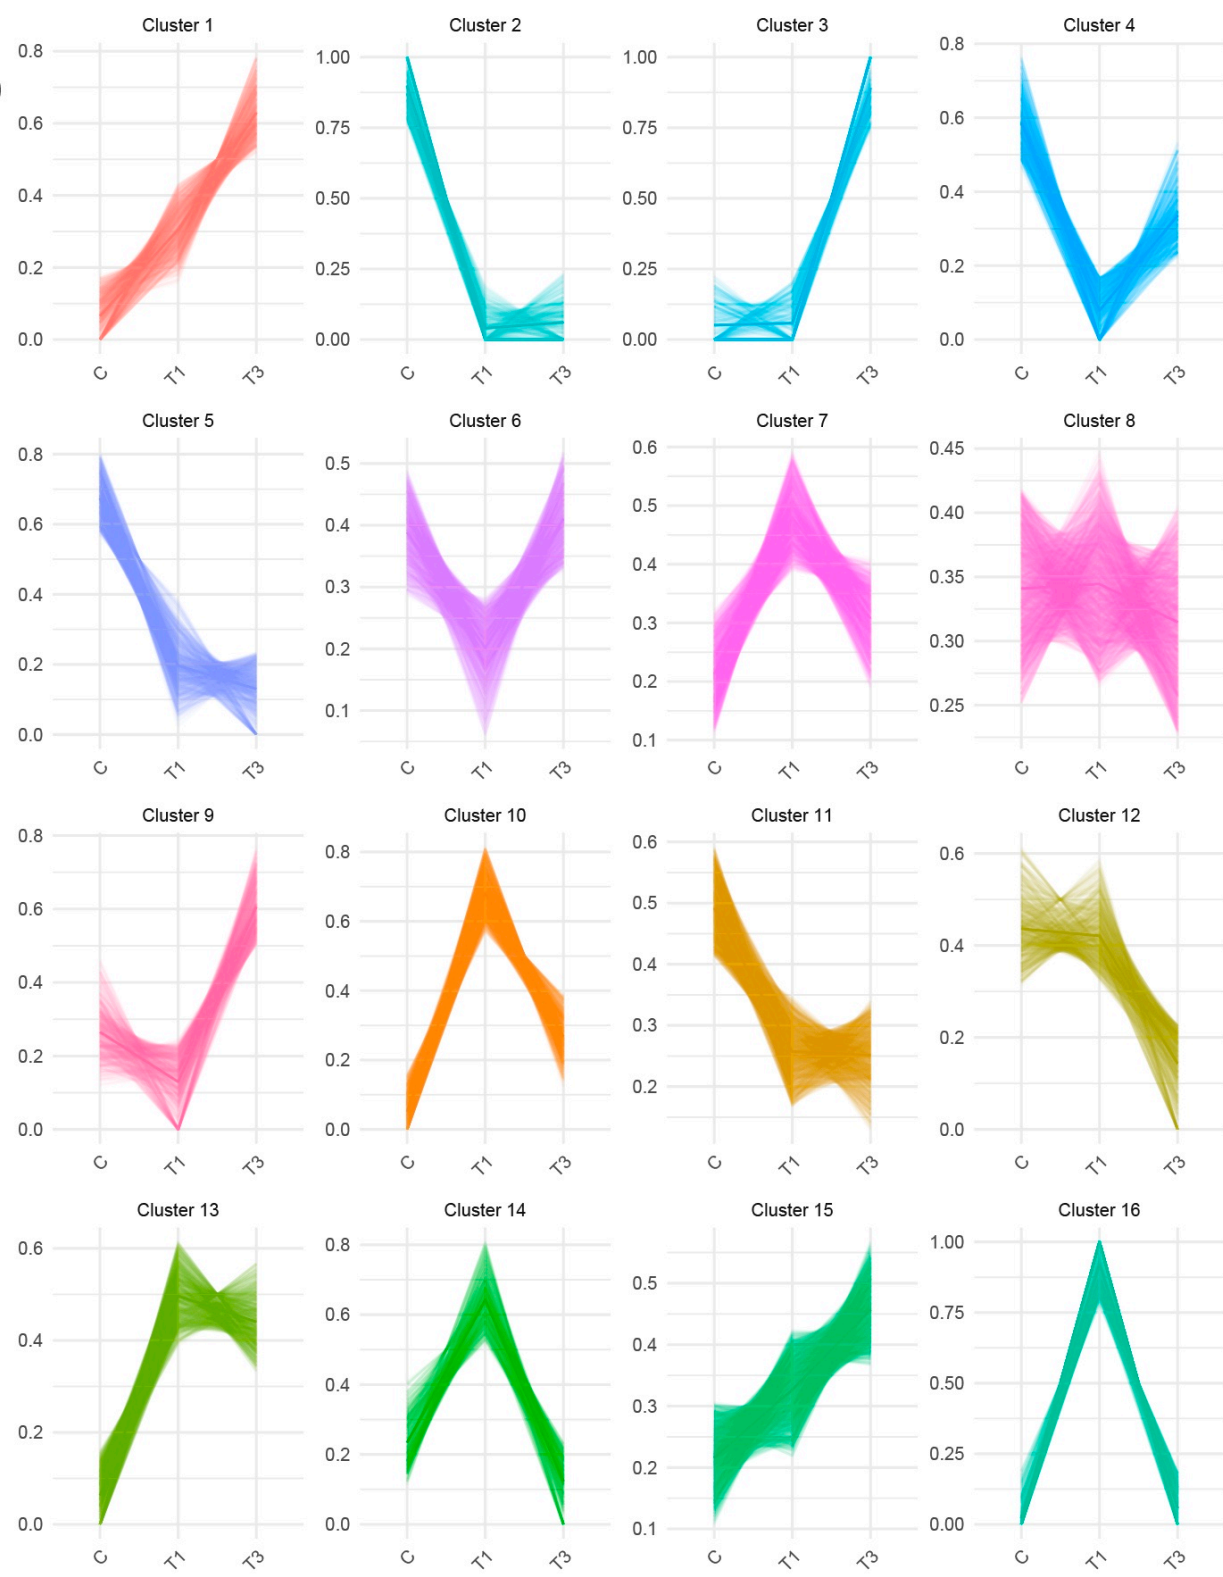

Figure S4

(a)

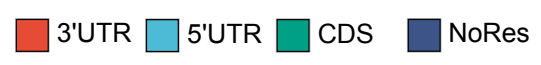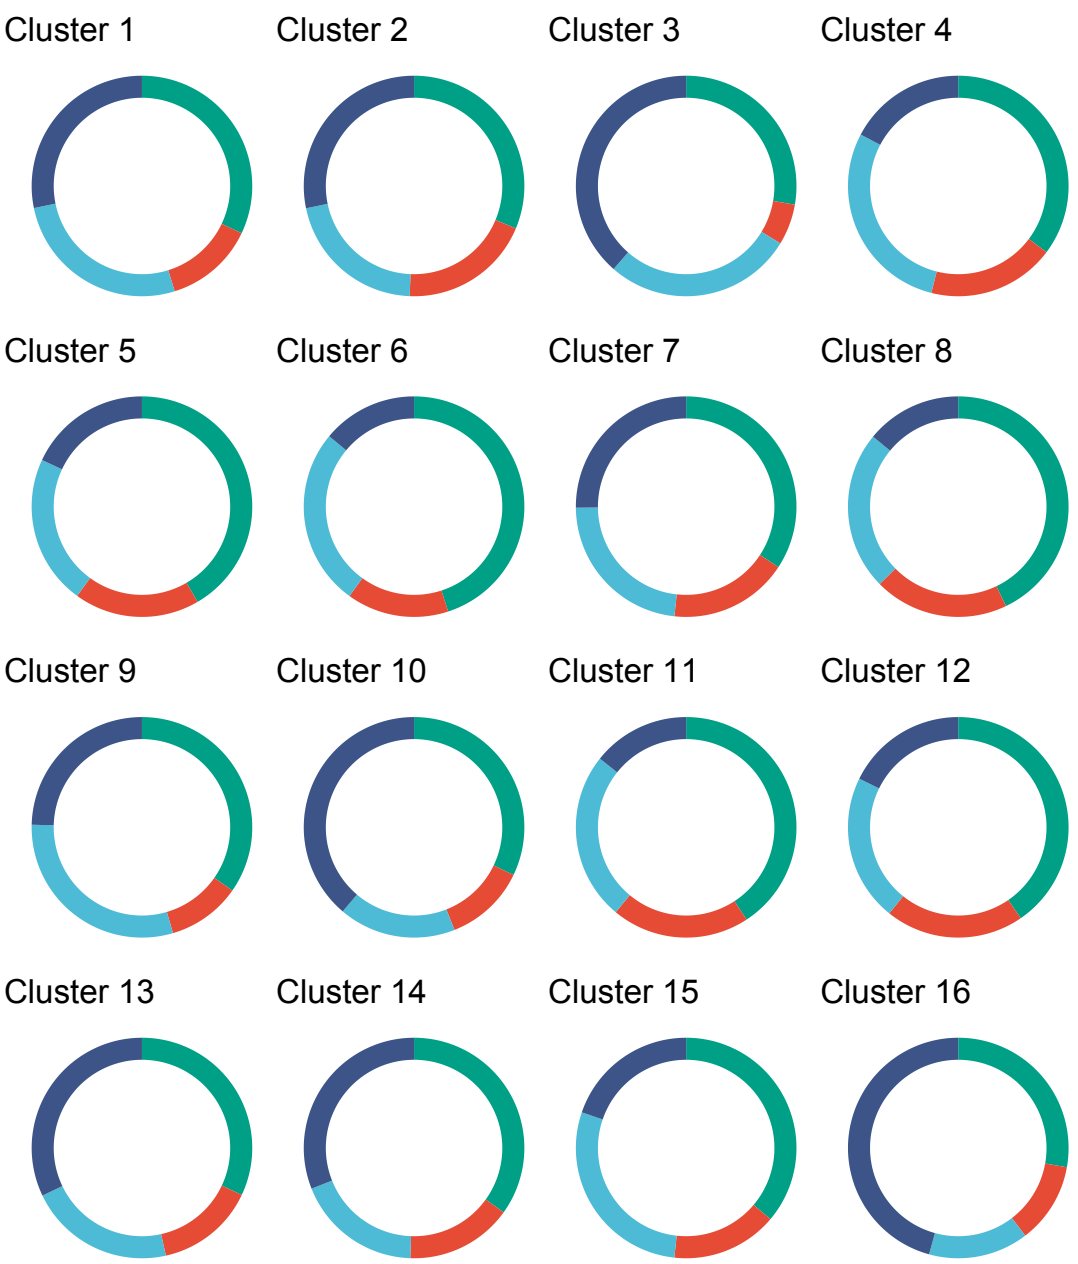

(b)

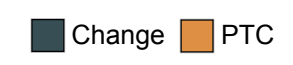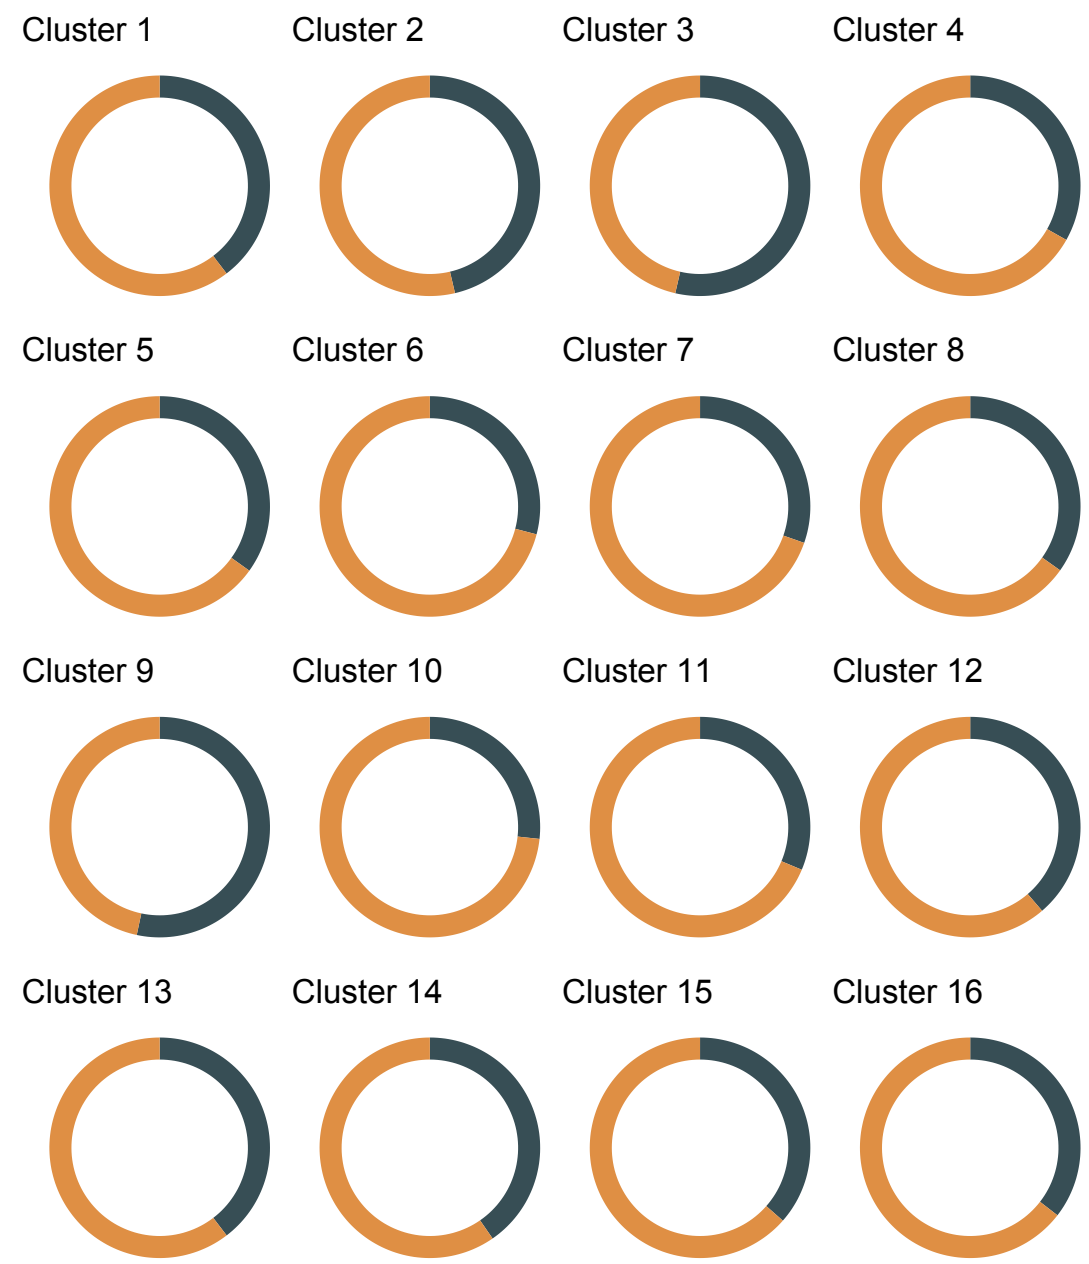

Figure S5

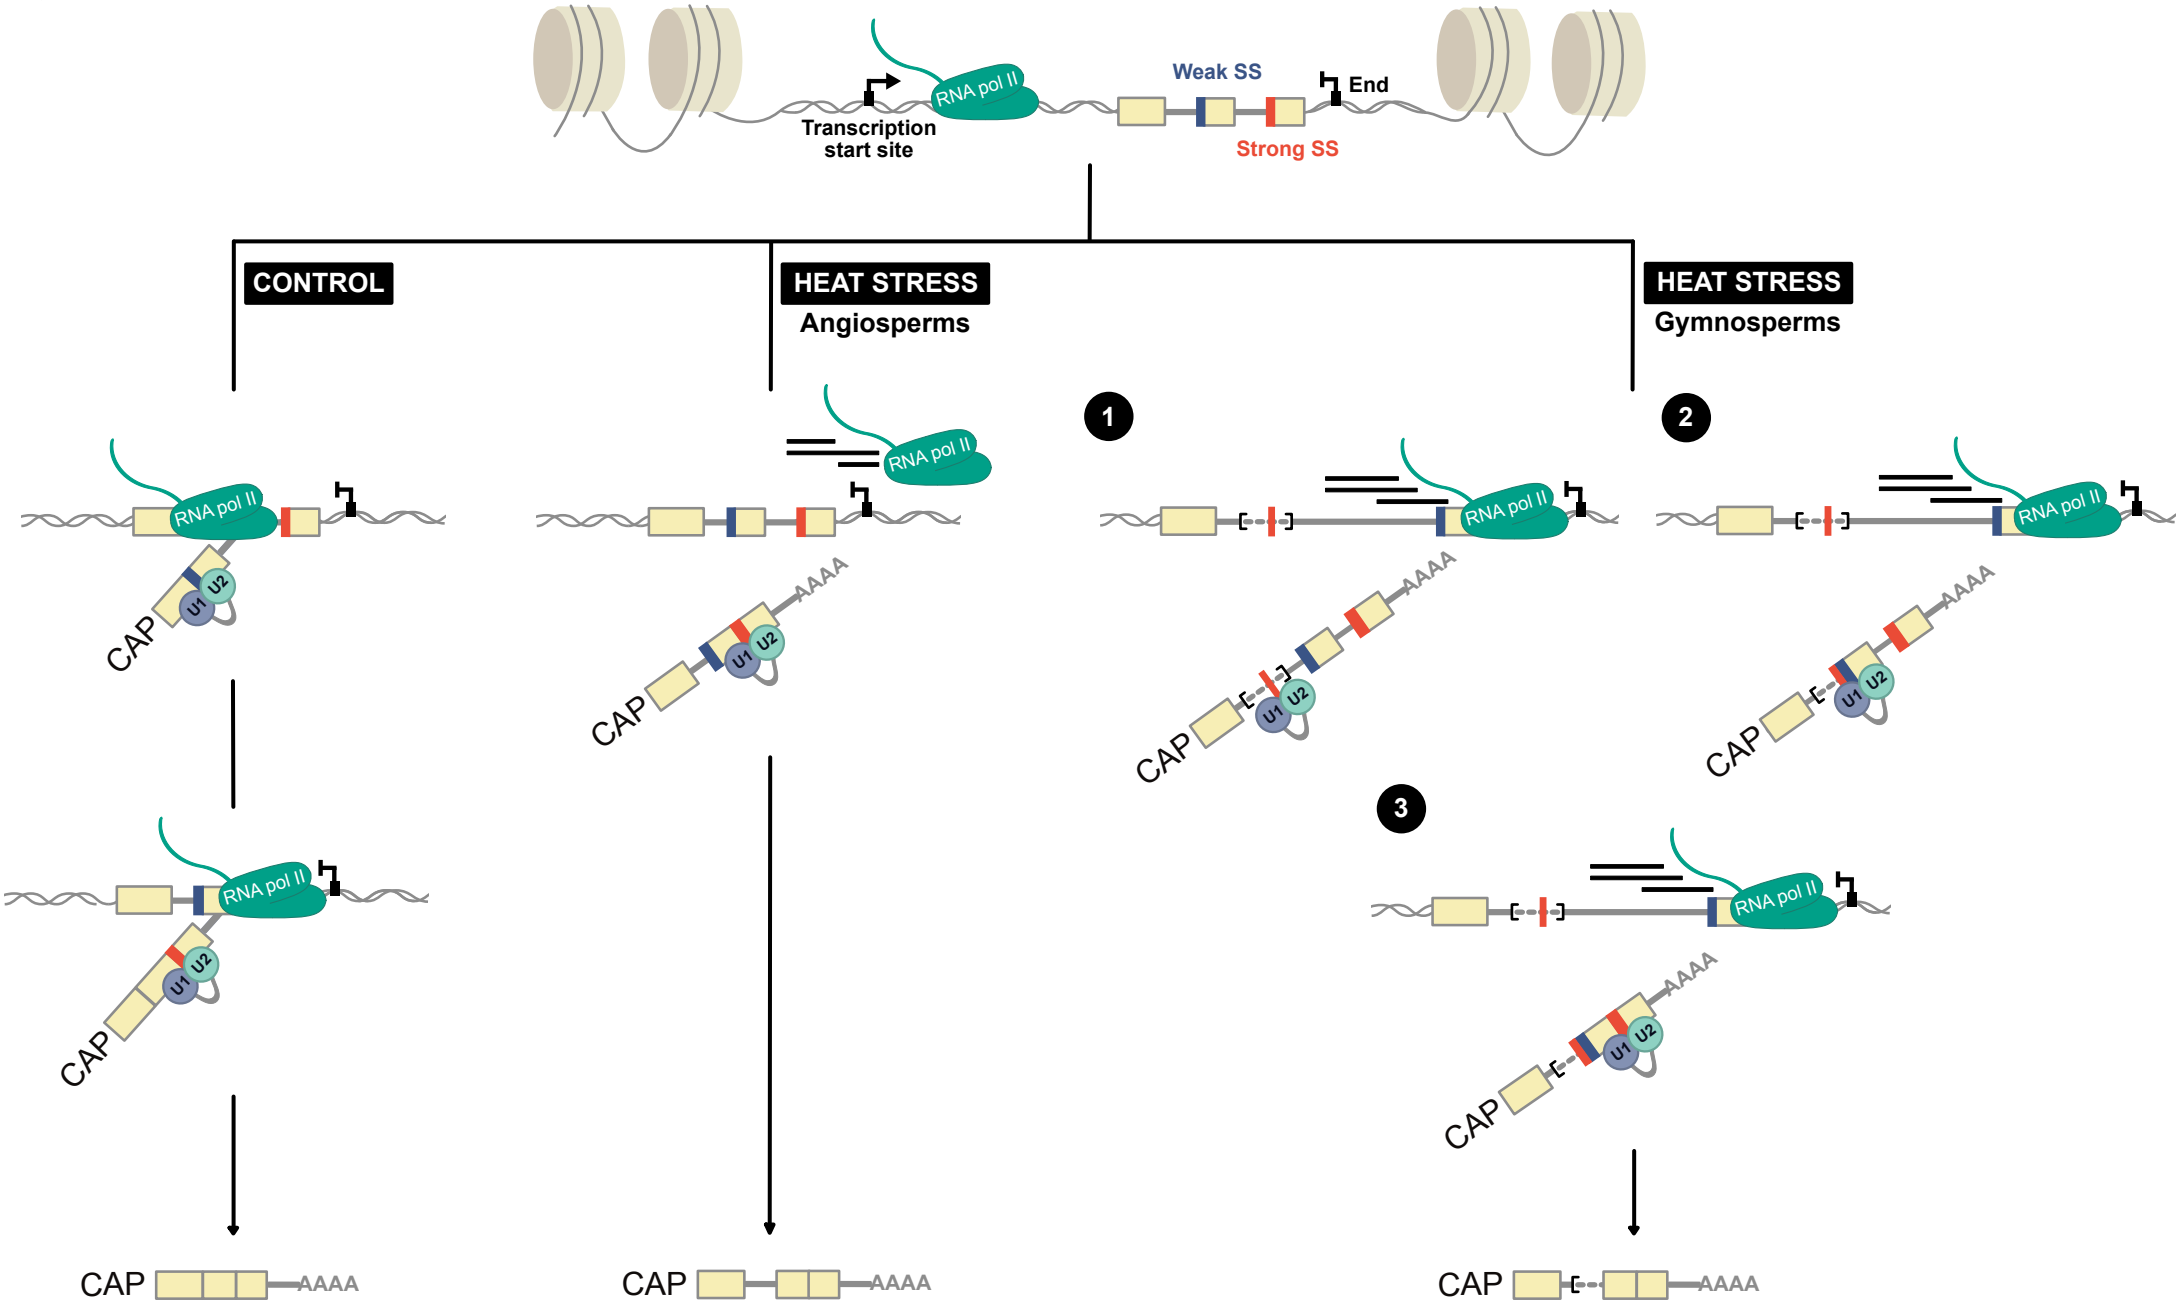

Figure S6

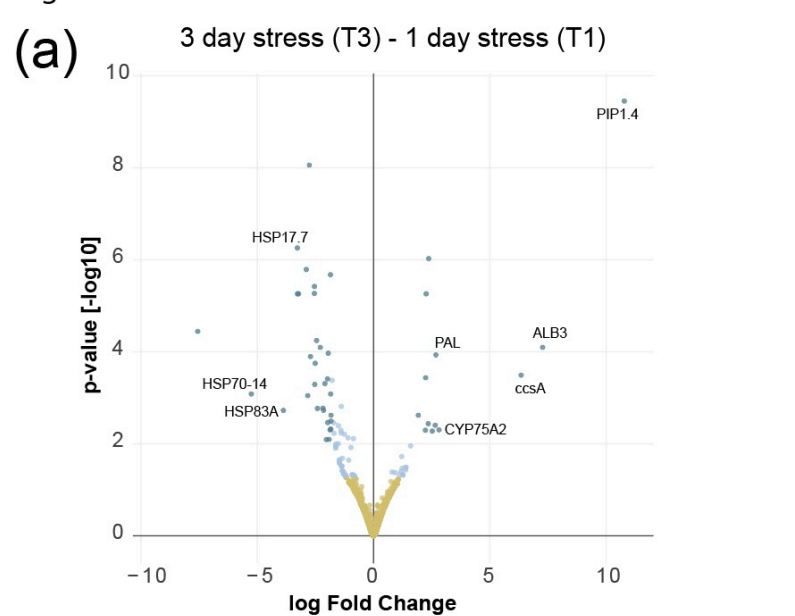

**(b)** 3 day stress (T3) - 1 day stress (T1)

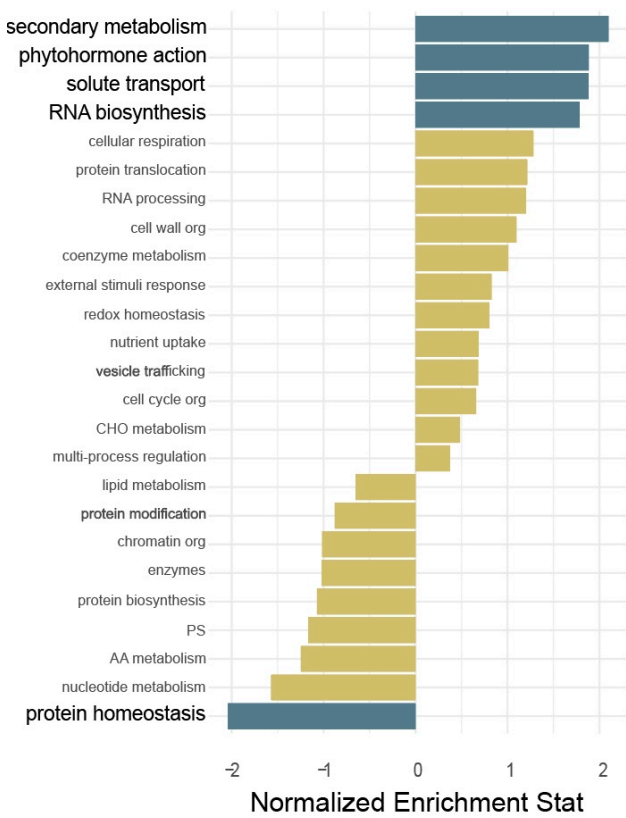

**(c)** 1 day stress (T1) - Control (C)

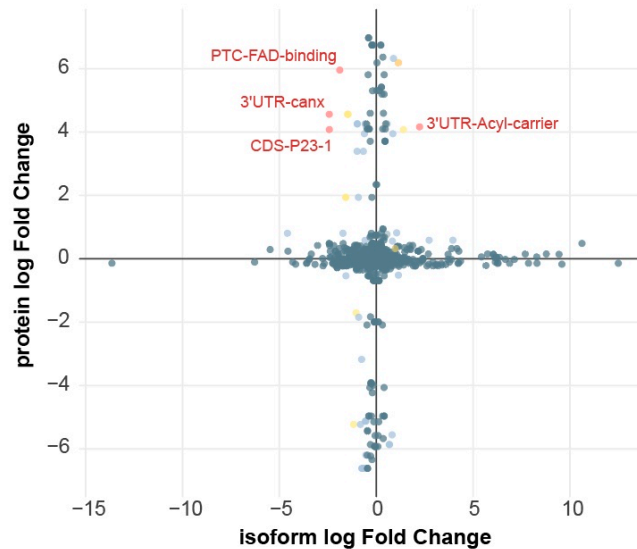

3 day stress (T3) - Control (C)

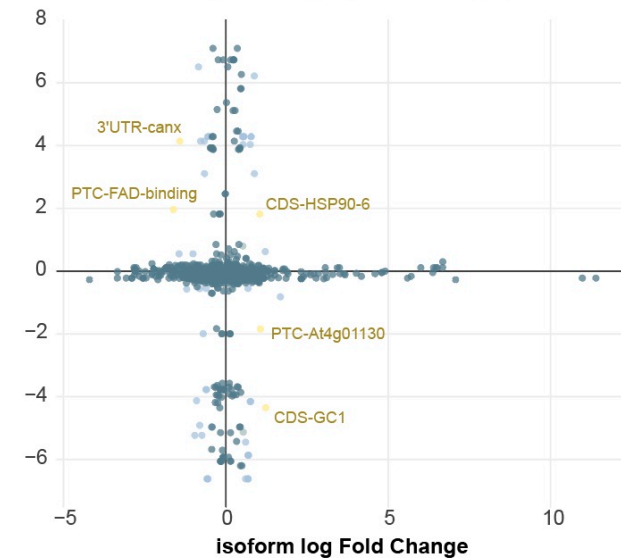

**(d)**

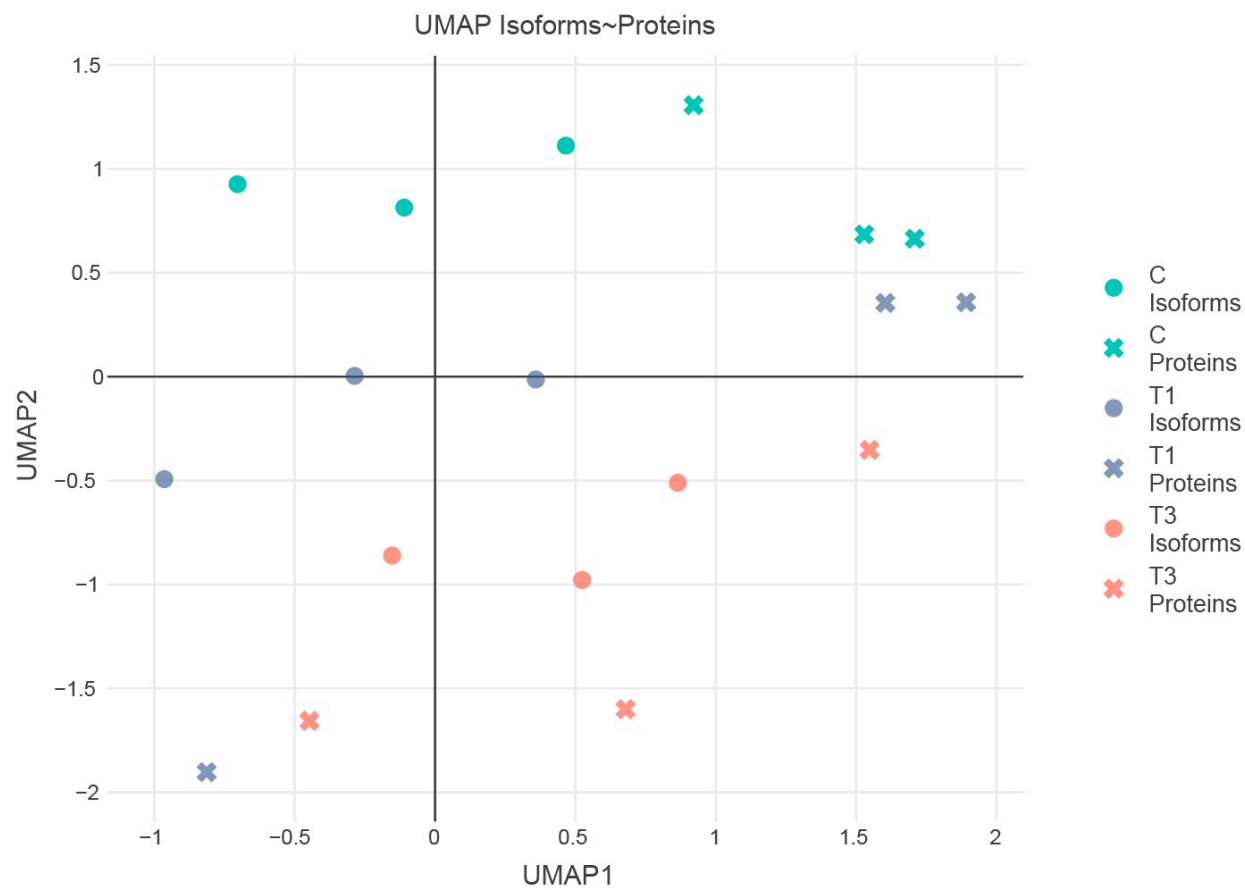

Figure S7

(a)

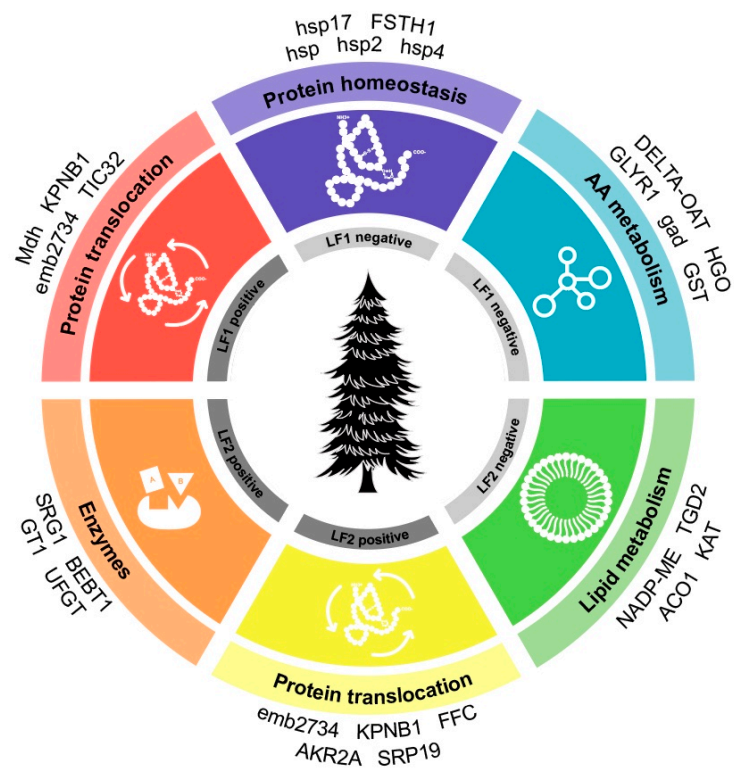

(b)

● C ◆ T1 ◆ T3

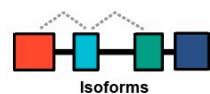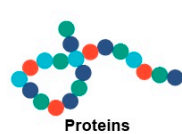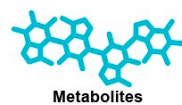

LF1

LF2

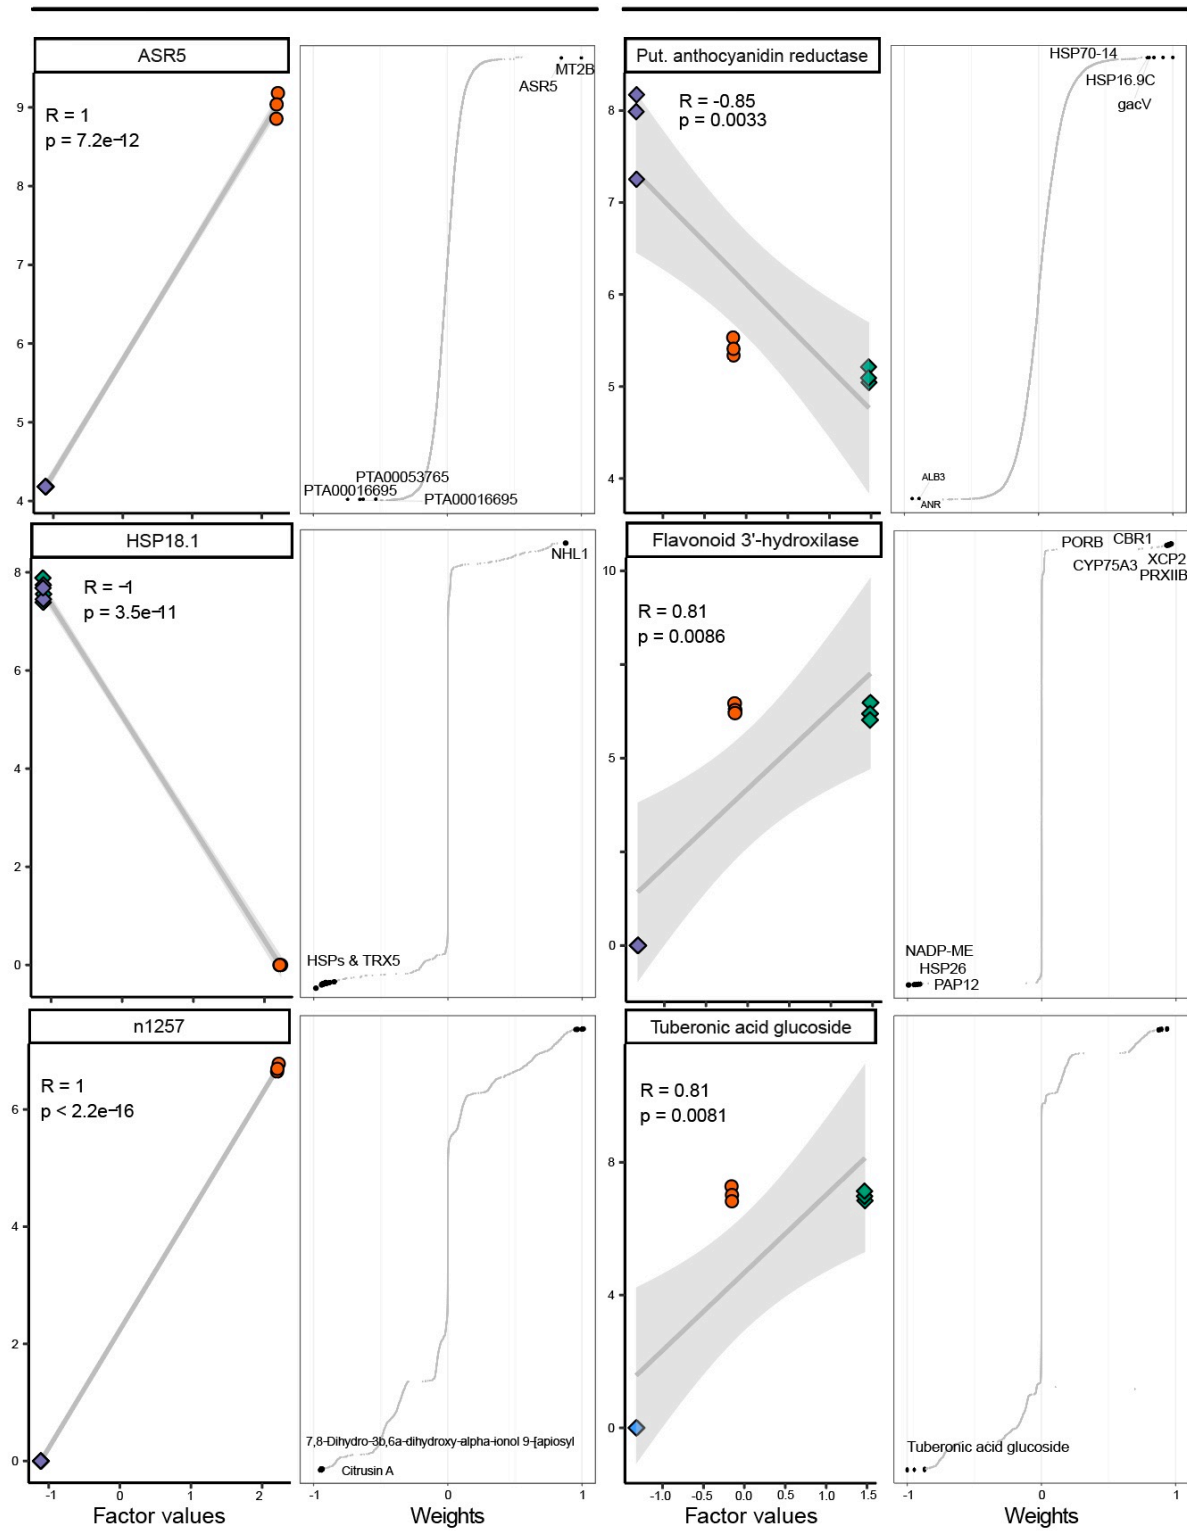

Supplement: TPJ-112-998-s006.pdf [file TPJ-112-998-s006.pdf]
